# Supplementary material
Source: PubMed Central journal article supplement (PMC3070577)
Supplement: mmc1.pdf [file mmc1.pdf]

## SUPPLEMENTAL MATERIAL

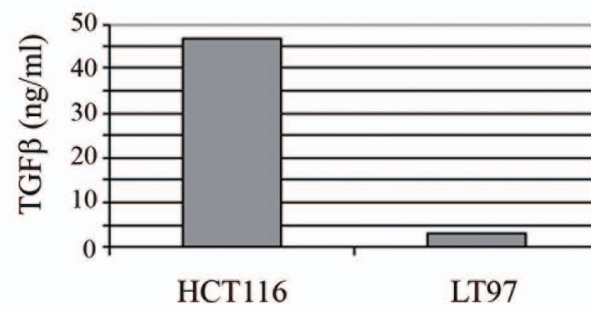

### **S1. Colon cancer cells express TGFβ-1 *in vitro*.**

TGFβ-1 content in conditioned medium from HCT116 colon cancer cells and LT97 adenoma cells measured by ELISA.
