# Supplementary material
Source: PubMed Central journal article supplement (PMC3070577)
Supplement: mmc2.pdf [file mmc2.pdf]

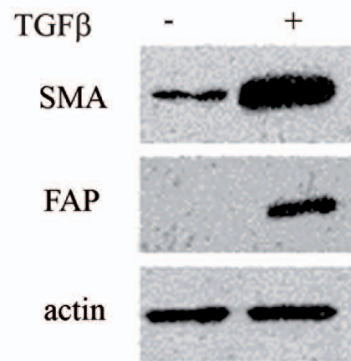

**S2. TGF $\beta$ -1 induces FAP expression in CCD-18Co fibroblasts *in vitro*.**

Western blot analysis showing the increased expression of FAP in CCD-18Co fibroblasts after TGF $\beta$ -1 activation. SMA was used as a control for activation, and  $\alpha$ -actin was used as loading control.
