# Supplementary material
Source: PubMed Central journal article supplement (PMC3070577)
Supplement: mmc3.pdf [file mmc3.pdf]

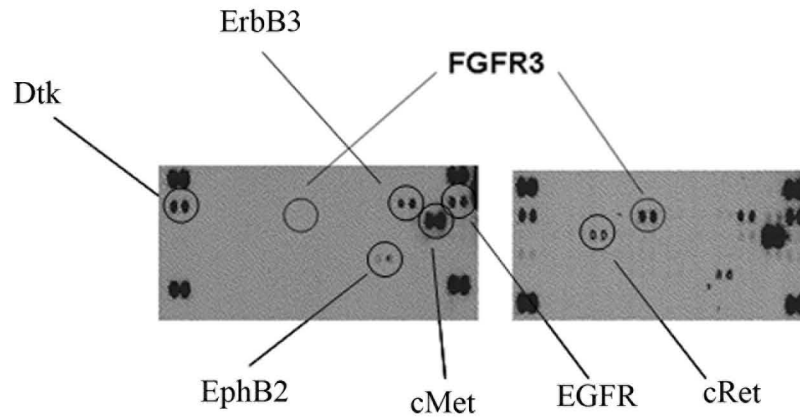

**S3. Proteome profiler array analyses phosphorylated receptor tyrosine kinases.**

HCT116 colon cancer cells were stimulated with conditioned medium from non-activated (left) or TGFβ-1 activated fibroblasts (right). All phosphorylated receptors are shown in the picture.
